# Supplementary material for: Whole exome sequence-based association analyses of plasma amyloid-β in African and European Americans; the Atherosclerosis Risk in Communities-Neurocognitive Study
Source: PubMed Central journal article supplement (PMC5509141; doi:10.1371/journal.pone.0180046), 2017-07-13

## S2 Fig: QQ Plots For T5 Burden Tests Using ARIC Participants With Exome Sequence

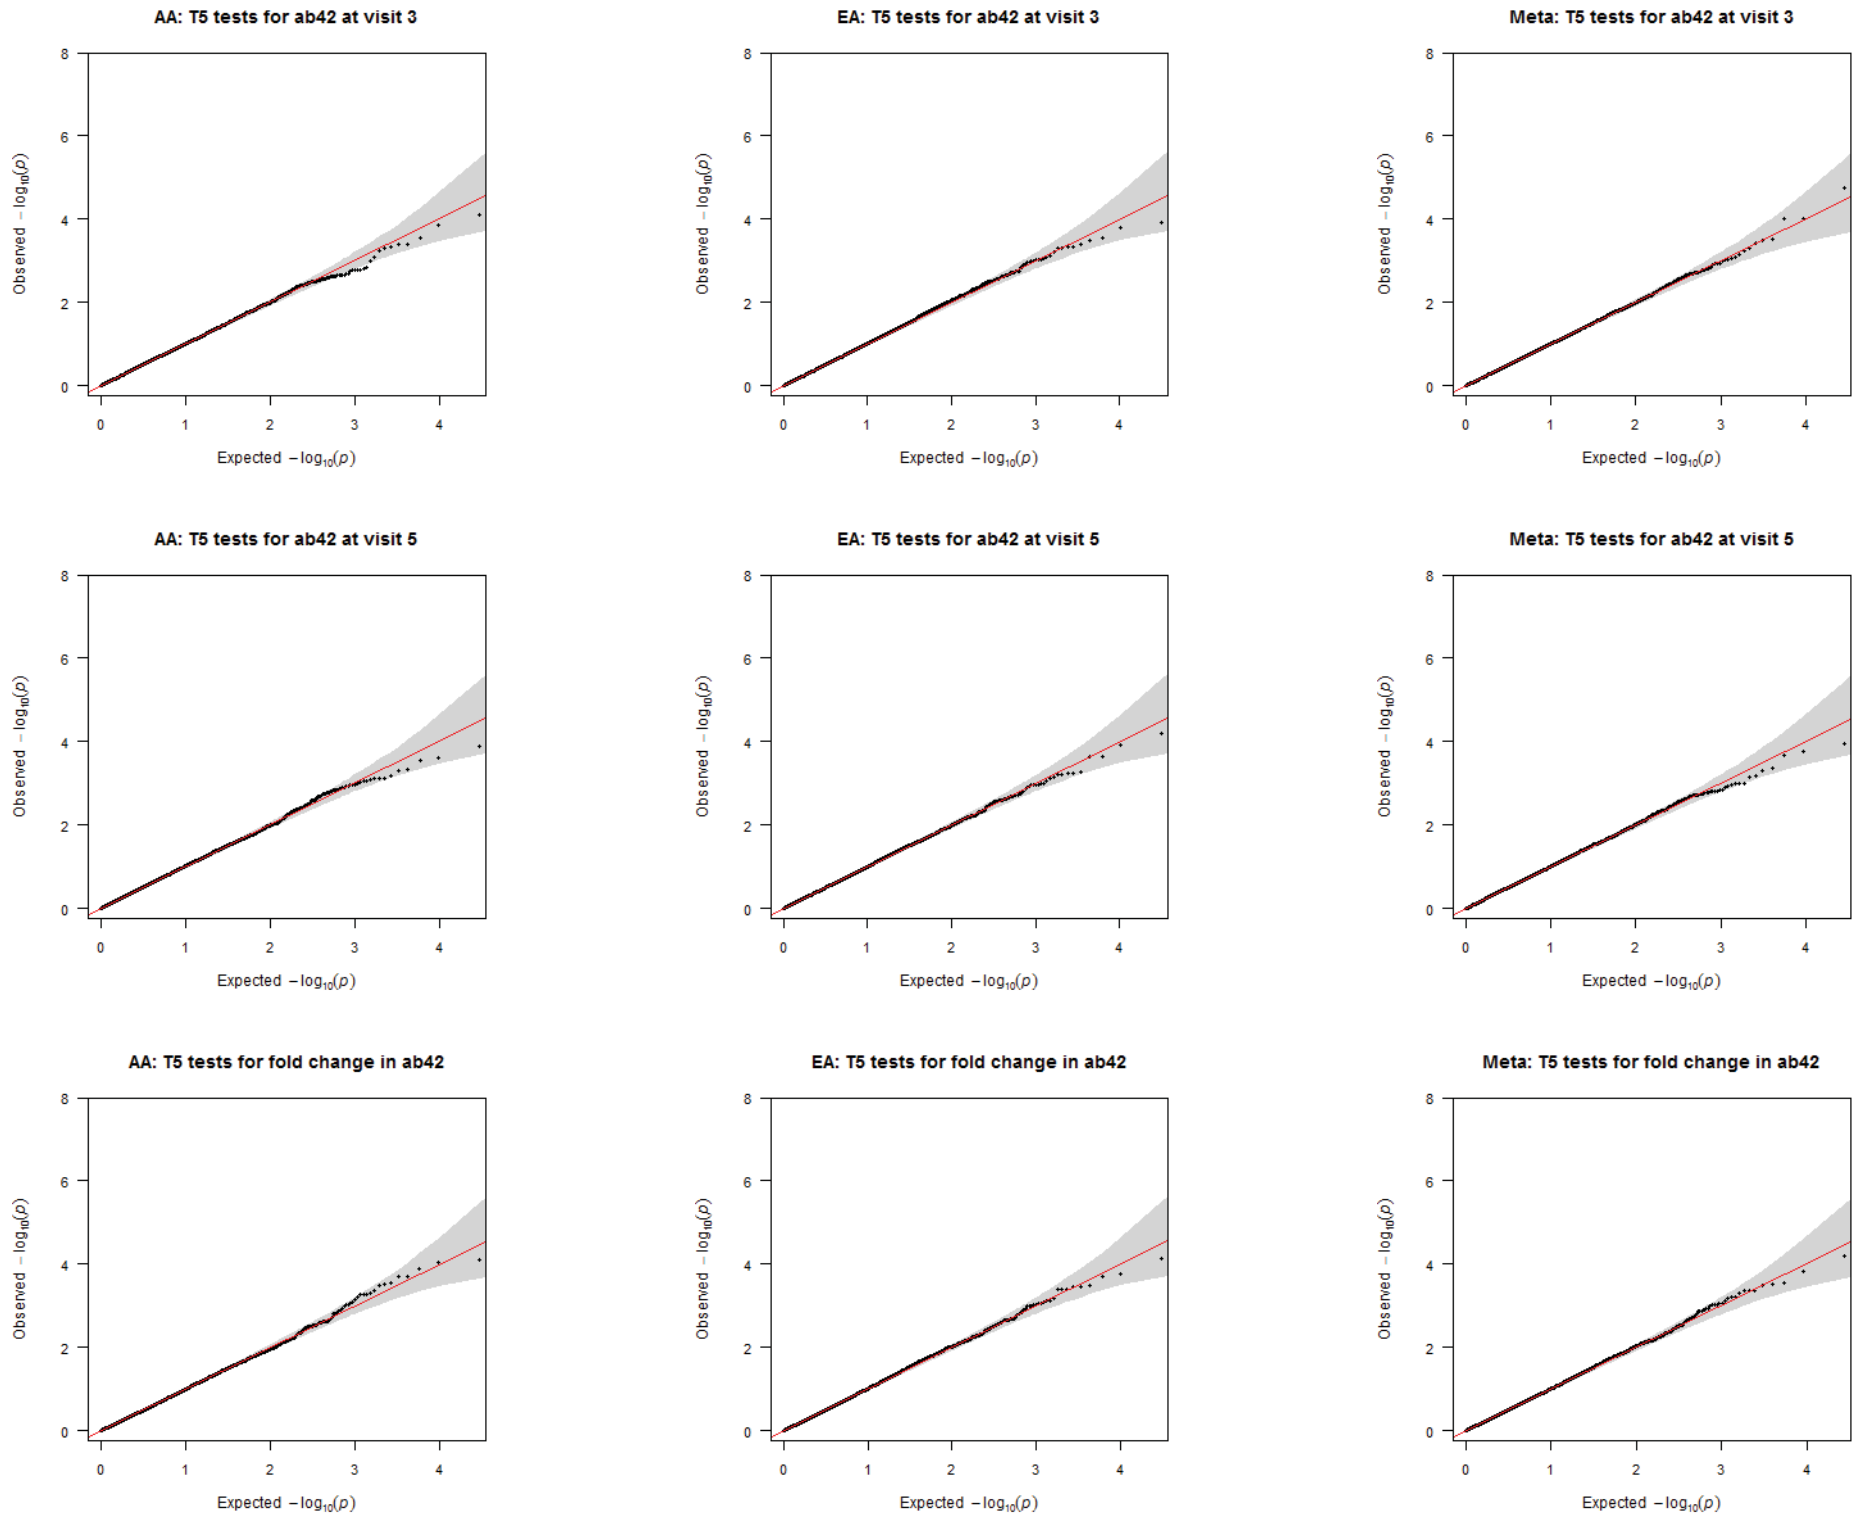

AA: T5 tests for ab42:ab40 ratio at visit 3

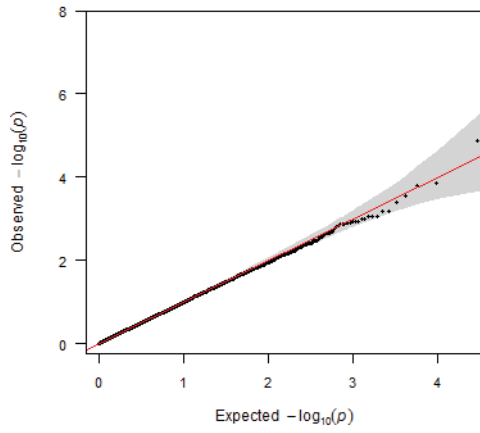

EA: T5 tests for ab42:ab40 ratio at visit 3

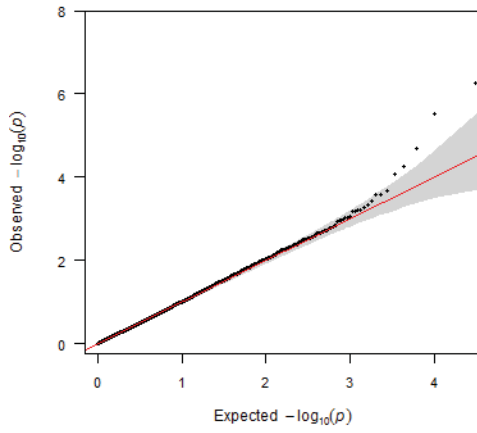

Meta: T5 tests for ab42:ab40 ratio at visit 3

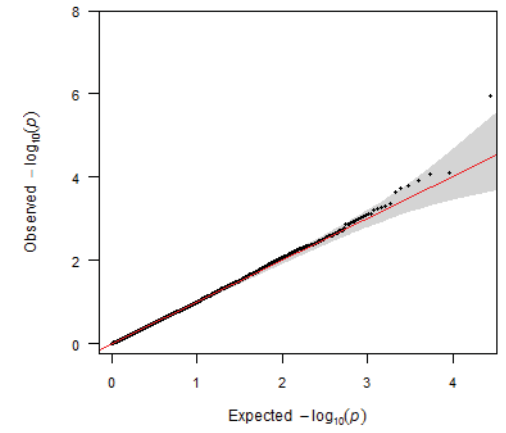

AA: T5 tests for ab42:ab40 ratio at visit 5

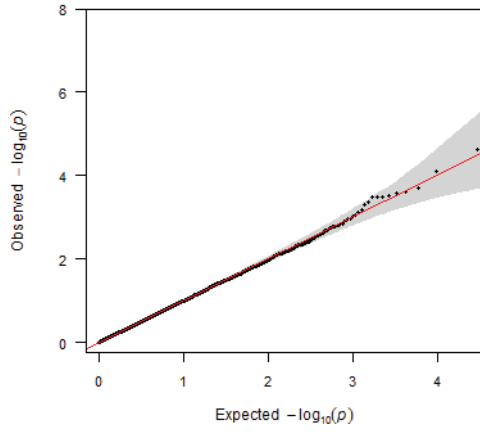

EA: T5 tests for ab42:ab40 ratio at visit 5

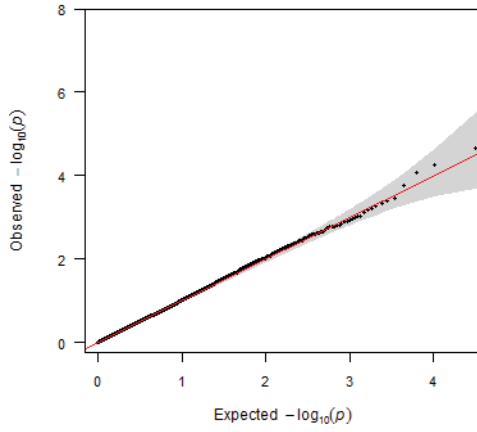

Meta: T5 tests for ab42:ab40 ratio at visit 5

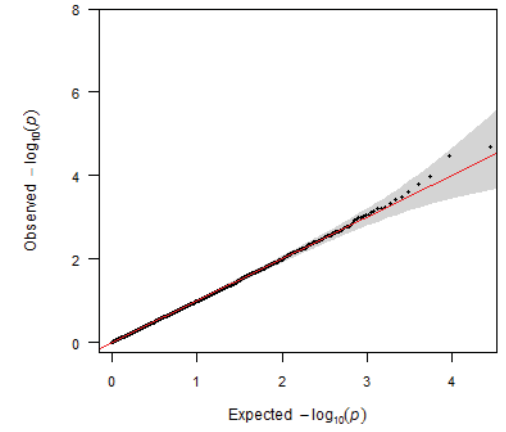

AA: T5 tests for fold change in ab42:ab40 ratio

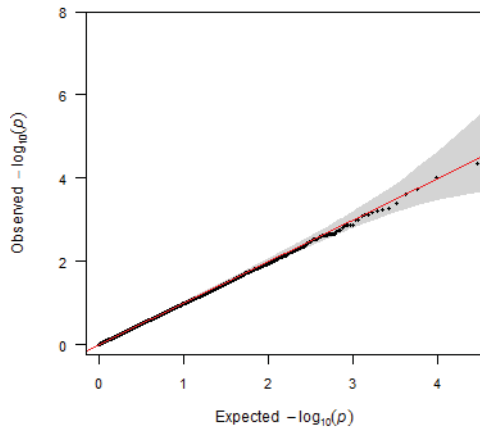

EA: T5 tests for fold change in ab42:ab40 ratio

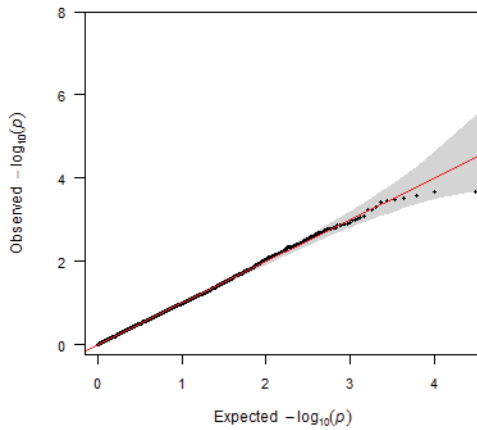

Meta: T5 tests for fold change in ab42:ab40 ratio

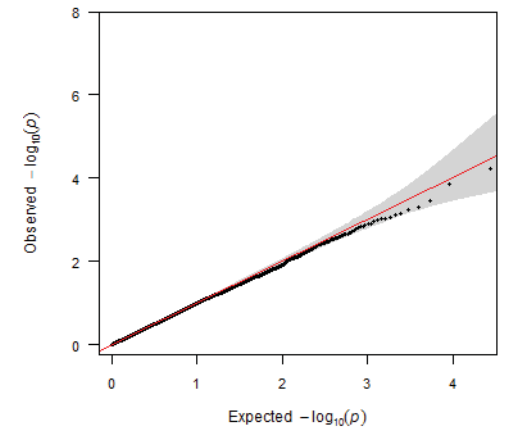

Supplement: pone.0180046.s002.pdf [file pone.0180046.s002.pdf]
