# Supplementary material for: Whole exome sequence-based association analyses of plasma amyloid-β in African and European Americans; the Atherosclerosis Risk in Communities-Neurocognitive Study
Source: PLoS One. 2017 Jul 13;12(7):e0180046. doi: 10.1371/journal.pone.0180046 (PMC5509141; doi:10.1371/journal.pone.0180046)
Supplement: S2 Table — (XLSX) [file pone.0180046.s009.xlsx]

## Sheet: S2 Table
S2 Table: Mean Plasma ab Levels By Cognitive Status in African Americans
