# Supplementary material for: Whole exome sequence-based association analyses of plasma amyloid-β in African and European Americans; the Atherosclerosis Risk in Communities-Neurocognitive Study
Source: PLoS One. 2017 Jul 13;12(7):e0180046. doi: 10.1371/journal.pone.0180046 (PMC5509141; doi:10.1371/journal.pone.0180046)
Supplement: S19 Table — (XLSX) [file pone.0180046.s026.xlsx]

## Sheet: S19 Table
S19 Table: Cross-Trait Results For Significant Single-Variants in ARIC Participants With Exome Sequence
SNV	Chromosome	Position (in basepairs)	Analysis	ab42:ab40 Ratio at Visit 3					ab42:ab40 Ratio at Visit 5					Fold-change in the ab42:ab40 Ratio
				N	CAF	b	se(b)	P-value	N	CAF	b	se(b)	P-value	N	CAF	b	se(b)	P-value
rs3733402 (Coded Allele A)	4	187158034	AA	370	0.710811	-0.00540779	0.0834322	0.94832	399	0.723058	-0.0998713	0.080951	0.217305	364	0.708791	-0.0480796	0.0833073	0.563848
			EA	945	0.50053	0.133755	0.0462974	0.00386407	995	0.510563	0.00131405	0.044813	0.976607	939	0.501066	-0.133822	0.0463184	0.00386256
			Meta	1315	0.559696	0.100992	0.0404823	0.0126054	1394	0.571385	-0.0224208	0.0392064	0.567412	1303	0.559095	-0.113575	0.040482	0.00502272
rs1801020 (Coded allele G)	5	176836532	AA	370	0.555556	0.180906	0.076653	0.018272	399	0.569095	-0.0365436	0.0727234	0.615315	364	0.557851	-0.17182	0.0770742	0.0257951
			EA	945	0.759341	0.0647049	0.0527074	0.219588	995	0.76357	-0.113509	0.0516686	0.0280303	939	0.760509	-0.162766	0.0529292	0.00210383
			Meta	1315	0.702002	0.102008	0.0434309	0.0188366	1394	0.707906	-0.0876906	0.0421201	0.03735	1303	0.703895	-0.165668	0.0436315	0.000146475
