# Supplementary material for: Whole exome sequence-based association analyses of plasma amyloid-β in African and European Americans; the Atherosclerosis Risk in Communities-Neurocognitive Study
Source: PLoS One. 2017 Jul 13;12(7):e0180046. doi: 10.1371/journal.pone.0180046 (PMC5509141; doi:10.1371/journal.pone.0180046)
Supplement: S22 Table — (XLSX) [file pone.0180046.s029.xlsx]

## Sheet: S22 Table
S22 Table: Sensitivity Analysis for INNO-BIA Plate Effects: Significant Single-Variant Tests in ARIC Participants With Exome Sequence
Trait	Gene	SNV Rs Number	Coded Allele	Chr	Position (in Basepairs)	Functional Region	Analysis	ARIC Discovery Ignoring Plate Effects					ARIC Discovery Adjusting for Plate Effects
								N	CAF	b	se(b)	p-value	N	CAF	b	se(b)	p-value
ab42 at visit 3	KLKB1	rs3733402	A	4	187158034	Nonsynonymous	AA	406	0.725369	-0.178889	0.0806349	0.02652	406	0.725369	-0.14	0.0806349	0.065
							EA	1007	0.510437	-0.262041	0.0443854	3.55321e-09	1007	0.510437	-0.27	0.0443854	8.24e-10
							Meta	1413	0.572194	-0.242705	0.0388838	4.3258e-10	1413	0.572194	-0.242705	0.0388838	3.69e-10
ab42 at visit 3	F12	rs1801020	G	5	176836532	UTR5	AA	406	0.565432	-0.284342	0.0719248	7.7073e-05	406	0.565432	-0.26	0.0719248	0.0003
							EA	1007	0.762887	-0.200735	0.0510316	8.3705e-05	1007	0.762887	-0.18	0.0510316	0.000554
							Meta	1413	0.706152	-0.22873	0.0416199	3.89166e-08	1413	0.706152	-0.203	0.0416199	9.72e-07
Fold-change in ab42	KLKB1	rs3733402	A	4	187158034	Nonsynonymous	AA	364	0.708791	0.141377	0.0830495	0.0886943	364	0.708791	0.21	0.0830495	0.011
							EA	941	0.501596	0.26549	0.046225	9.2783e-09	941	0.501596	0.23	0.046225	6.89e-07
							Meta	1305	0.559388	0.236134	0.0403901	5.02508e-09	1305	0.559388	0.22	0.0403901	2.41e-08
NOTE: Chr=Chromosome; N=Sample size; CAF=Coded allele frequency; b=Effect of each copy of the coded allele on the trait; se(b)=Standard error of the effect of each copy of the coded allele on the trait. Since each INNO-BIA plate contained both African and European individuals, we regressed the amyloid trait onto race (indicator of AA ethnicity), the covariates, covariate-race interactions, and fi…
