# Supplementary material for: Whole exome sequence-based association analyses of plasma amyloid-β in African and European Americans; the Atherosclerosis Risk in Communities-Neurocognitive Study
Source: PLoS One. 2017 Jul 13;12(7):e0180046. doi: 10.1371/journal.pone.0180046 (PMC5509141; doi:10.1371/journal.pone.0180046)
Supplement: S23 Table — (XLSX) [file pone.0180046.s030.xlsx]

## Sheet: S23 Table
S23 Table: Sensitivity Analysis for INNO-BIA Plate Effects: SKAT and T5 Results Using ARIC Participants With Exome Sequence
Test	Trait	Gene	Chr	Analysis Group	ARIC Discovery Ignoring Plate Effects						ARIC Discovery Adjusting for Plate Effects
					N	MAC	# SNVs	b	se(b)	p-value	N	MAC	# SNVs	b	se(b)	p-value
T5	ab42:ab40 ratio at visit 3	ITPRIP	10	AA	370	47	8	-0.108094	0.153488	0.481275	370	47	8	-0.11	0.15	0.487
				EA	945	20	5	1.13431	0.226346	5.40369e-07	945	20	5	1.14	0.23	4.73e-07
				Meta	1315	67	13	0.283251	0.127034	0.025766	1315	67	13	0.29	0.127	0.024
		PLIN2	9	AA	370	18	6	-0.138996	0.245541	0.571337	370	18	6	-0.16	0.24	0.51
				EA	945	17	7	-1.14902	0.245782	2.94038e-06	945	17	7	-1.06	0.245	1.55e-05
				Meta	1315	146	13	-0.33253	0.0846713	8.59046e-05	1315	146	13	-0.32	0.084	0.000136
		TSPAN18	11	AA	370	6	2	1.00303	0.419341	0.01676	370	6	2	1.1	0.42	0.00833688
				EA	945	14	5	1.15178	0.270336	2.03908e-05	945	14	5	1.09	0.27	5.47e-05
				Meta	1315	20	6	1.10811	0.227213	1.07725e-06	1315	20	6	1.09	0.227	1.43e-06
SKAT	ab42:ab40 ratio at visit 3	NCOA1	2	AA	370	11	5	NA	NA	1.33672e-06	370	11	5	NA	NA	2.01e-06
				EA	945	85	15	NA	NA	0.0752648	945	85	15	NA	NA	0.058
				Meta	1315	96	19	NA	NA	0.652203	1315	96	19	NA	NA	0.62
	Fold-change in ab42	NT5C3B	17	AA	364	7	4	NA	NA	5.6729e-07	364	7	4	NA	NA	4.4e-07
				EA	941	9	5	NA	NA	0.876967	941	9	5	NA	NA	0.43
				Meta	1305	16	9	NA	NA	3.18204e-06	1305	16	9	NA	NA	1.08e-06
NOTE: Chr=Chromosome; N=Sample size; MAC=Number of Minor Allele Copies; # SNPs= Number of SNPs contributing to the gene-based test; b=Effect of the minor alleles on the trait; se(b)=Standard error of the effect of the minor alleles. Since each INNO-BIA plate contained both African and European individuals, we regressed the amyloid trait onto race (indicator of AA ethnicity), the covariates, covar…
